# Supplementary material for: Igf signaling couples retina growth with body growth by modulating progenitor cell division
Source: Oxford University Press journal article supplement (doi:10.1242/dev.199133), 2021-03-15
Supplement: dev199133supp.pdf [file dev199133supp.pdf]

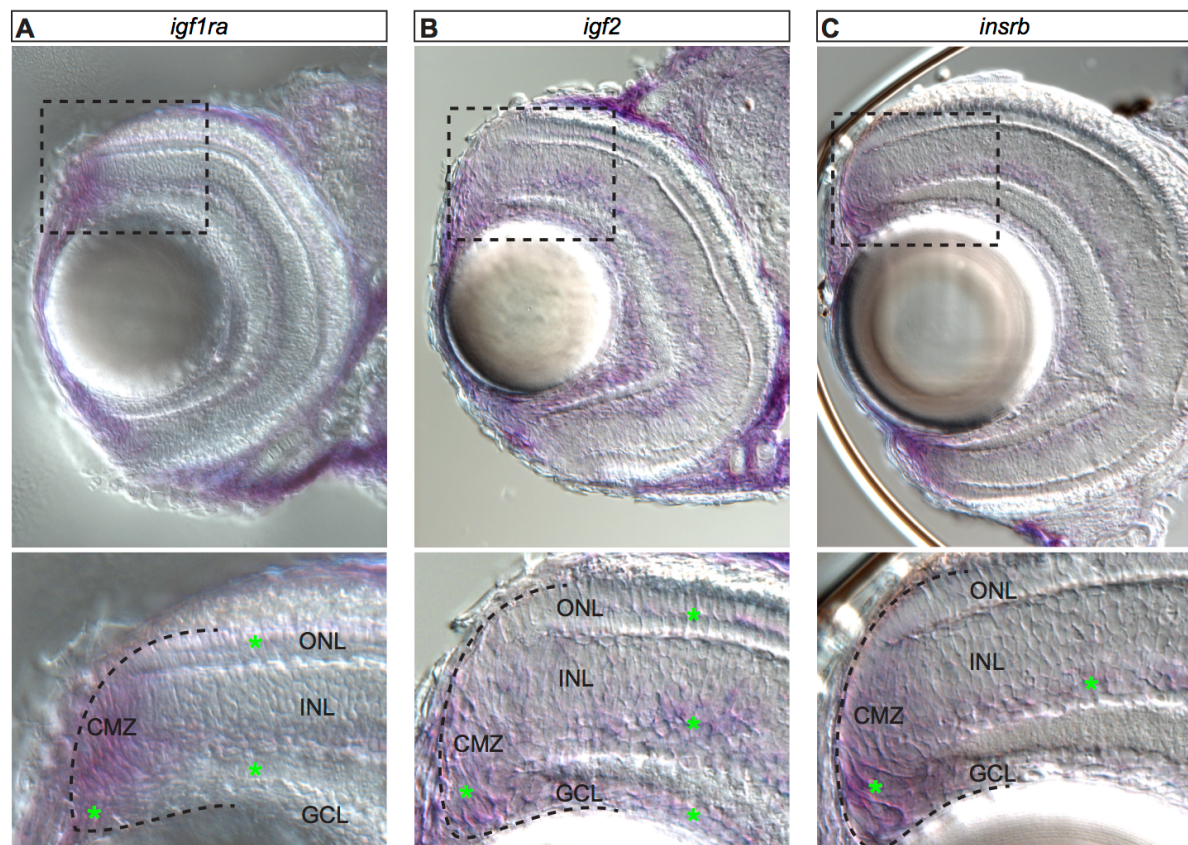

**Fig. S1: Igf signaling pathway components are expressed in the hatchling CMZ.** (A-C) Cryosections of whole-mount *in situ* hybridizations of hatchling retinae (n = 3 fish each). Expression of *igf1ra* (A) is visible in CMZ, outer (ONL) and inner (INL) nuclear layer (asterisks). *Igf2* (B) is expressed in CMZ, ONL, INL and ganglion cell layer (GCL). CMZ and INL show expression of *insrb* (C).

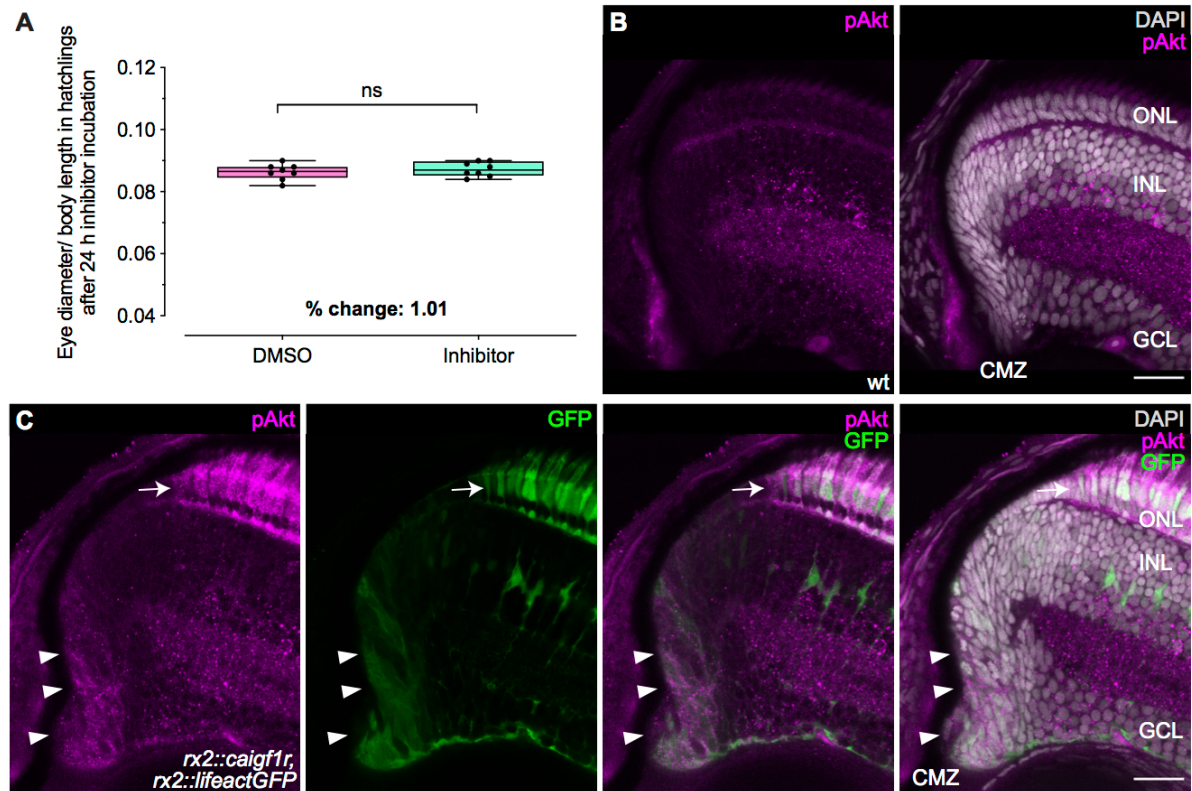

**Fig. S2: *Caigf1r* expression results in increased downstream signaling activation in the CMZ.** (A) Quantification of relative eye size (eye diameter normalized to body length) of wt hatchlings incubated for 24 h in DMSO ( $n = 8$ ) and 10  $\mu$ M Igf1r inhibitor NVP-AEW541 ( $n = 8$ ) (t-test:  $^{ns}P = 0.4799$ ). The percentage change of relative eye size means of DMSO- and inhibitor-treated hatchlings is 1.01%. (B,C) Cryosections of wt (B) and *rx2::caigf1r* (C) retinæ at hatching stage. The pAkt-positive domain (magenta, arrowheads) is enlarged in *rx2::caigf1r* (C) compared to wt (B) retinæ, co-localizing with GFP signal (green) also in PRCs (C, arrow) ( $n = 3$  fish each). Scale bars are 10  $\mu$ m. ns, not significant. Box plots depict median + quartiles with min-max whiskers.

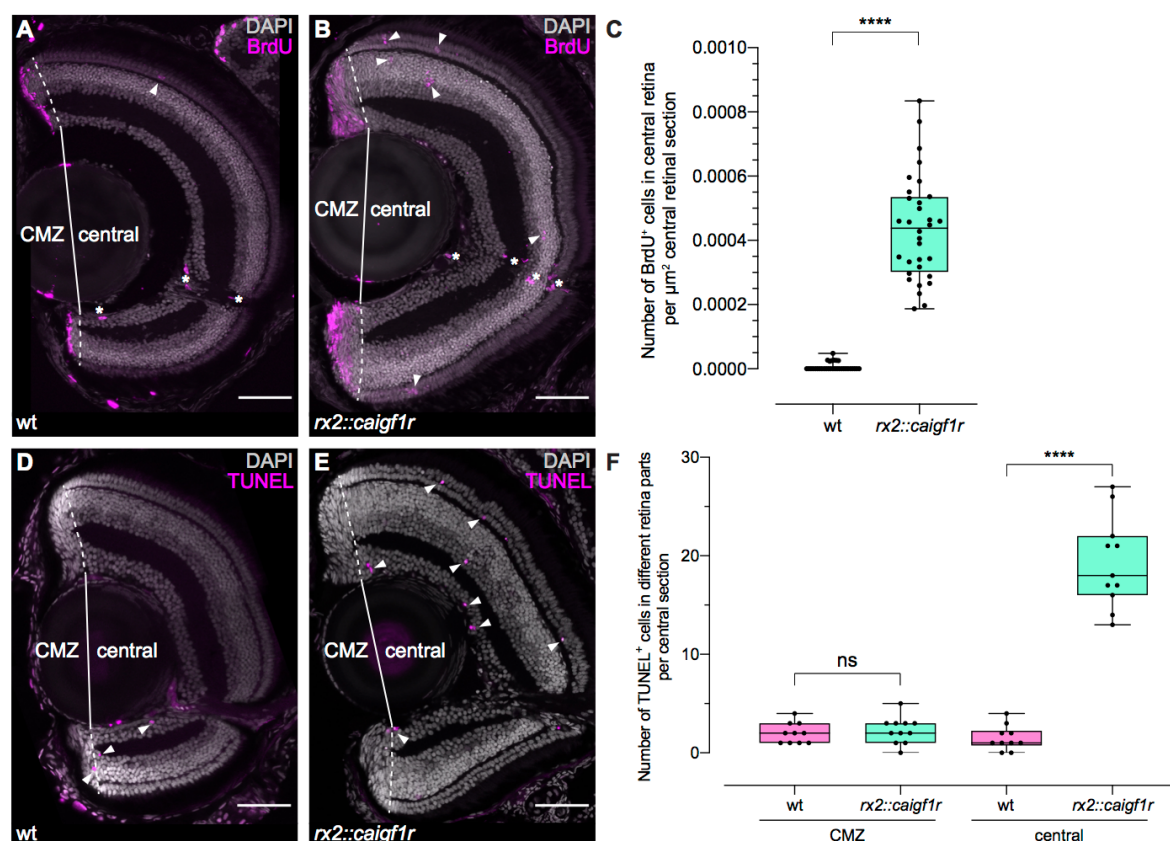

**Fig. S3: Neuroretinal expansion in *rx2::caigf1r* retinæ is driven neither by central retina proliferation nor by decreased apoptosis.** (A,B) Cryosections of wt (A) and *rx2::caigf1r* (B) retinæ at hatching stage fixed after 2h BrdU incubation. BrdU-positive cells (magenta, arrowheads) are present in the central region of wt (A) and *rx2::caigf1r* (B) retinæ. Asterisks mark BrdU-positive cells in the lens epithelium and the optic nerve. Scale bars are 50  $\mu\text{m}$ . (C) Quantification of BrdU-positive cell number in the central retina per 16  $\mu\text{m}^2$  section normalized to retinal area [ $\mu\text{m}^2$ ] shows slightly elevated, very low numbers in *rx2::caigf1r* ( $n = 32$  sections from 8 retinæ in 4 fish) compared to wt ( $n = 32$  sections from 8 retinæ in 4 fish) retinæ (Mann-Whitney test: \*\*\*\* $P > 0.0001$ ). (D,E) Cryosections of wt (D) and *rx2::caigf1r* (E) retinæ at hatching stage. TUNEL-positive nuclei (magenta, arrowheads) are present in *rx2::caigf1r* (D) and wt (E) retinæ. Scale bars are 50  $\mu\text{m}$ . (F) Quantification of TUNEL-positive cell number per 16  $\mu\text{m}$  section shows increased apoptosis in the central but not CMZ region of *rx2::caigf1r* ( $n = 11$  sections from 8 retinæ in 4 fish) compared to wt ( $n = 10$  sections from 8 retinæ in 4 fish) retinæ (t-test:  $^{ns}P_{\text{CMZ}} = 0.6142$ , \*\*\*\* $P_{\text{central}} > 0.0001$ ). ns, not significant. Box plots depict median + quartiles with min-max whiskers.



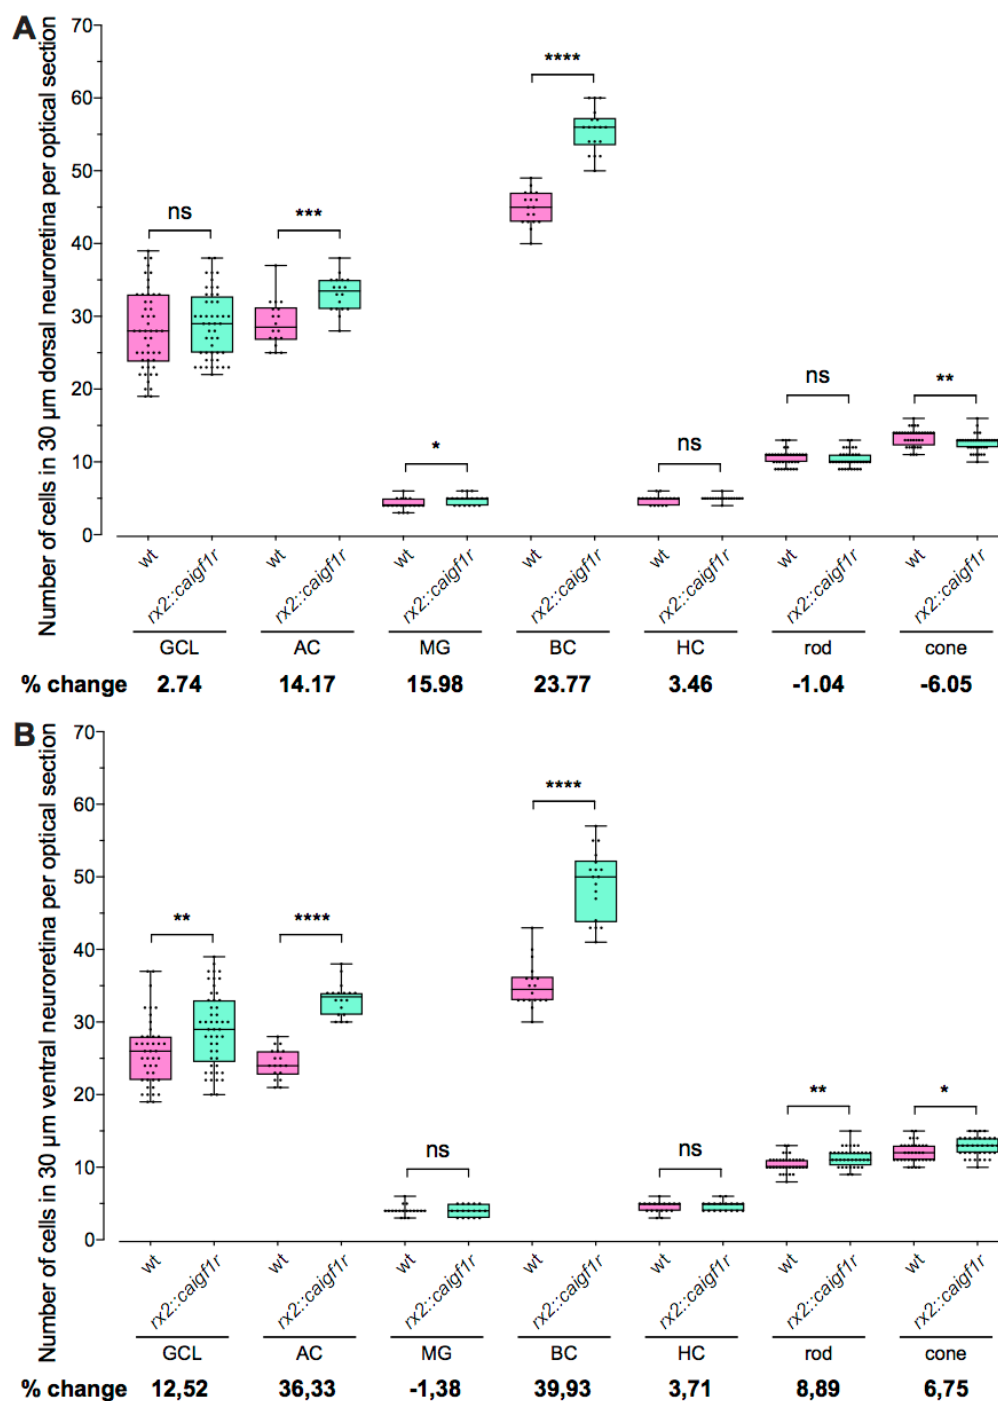

**Fig. S4: Cell type composition of the dorsal and ventral neuroretina is changed in *rx2::caigf1r* fish.** (A) Quantification of cell type number in a 30  $\mu$ m wide region in the dorsal differentiated peripheral neuroretina shows increased AC and BC number in *rx2::caigf1r* ( $n \geq 35$  sections from 6 retinæ in 3 fish) compared to wt ( $n \geq 36$  sections from 6 retinæ in 3 fish) retinæ (t-test:  $^{***}P_{AC} = 0.0001$ ,  $^{***}P_{BC} < 0.0001$ , Mann-Whitney test:  $^{ns}P_{GCL} = 0.4193$ ,  $^{*}P_{MG} = 0.0127$ ,  $^{ns}P_{HC} = 0.2326$ ,  $^{ns}P_{rod} = 0.6162$ ,  $^{**}P_{cone} = 0.0031$ ). Percentage change of the cell number means of wt and *rx2::caigf1r* shows large changes ( $\geq 10\%$ ) in AC, MG and BC number. (B) Quantification of cell type number in



a 30  $\mu\text{m}$  wide region in the ventral differentiated peripheral neuroretina shows increased GCL, AC and BC number in *rx2::caigf1r* ( $n \geq 35$  sections from 6 retinae in 3 fish) compared to wt ( $n \geq 36$  sections from 6 retinae in 3 fish) retinae (t-test:  $^{**}P_{\text{GCL}} = 0.0023$ ,  $^{****}P_{\text{AC}} < 0.0001$ ,  $^{****}P_{\text{BC}} < 0.0001$ , Mann-Whitney test:  $^{\text{ns}}P_{\text{MG}} = 0.8407$ ,  $^{\text{ns}}P_{\text{HC}} = 0.6608$ ,  $^{**}P_{\text{rod}} = 0.0017$ ,  $^{*}P_{\text{cone}} = 0.0150$ ). Percentage change of the cell number means of wt and *rx2::caigf1r* shows large changes ( $\geq 10\%$ ) in GCL, AC and BC number. ns, not significant. Box plots depict median + quartiles with min-max whiskers.

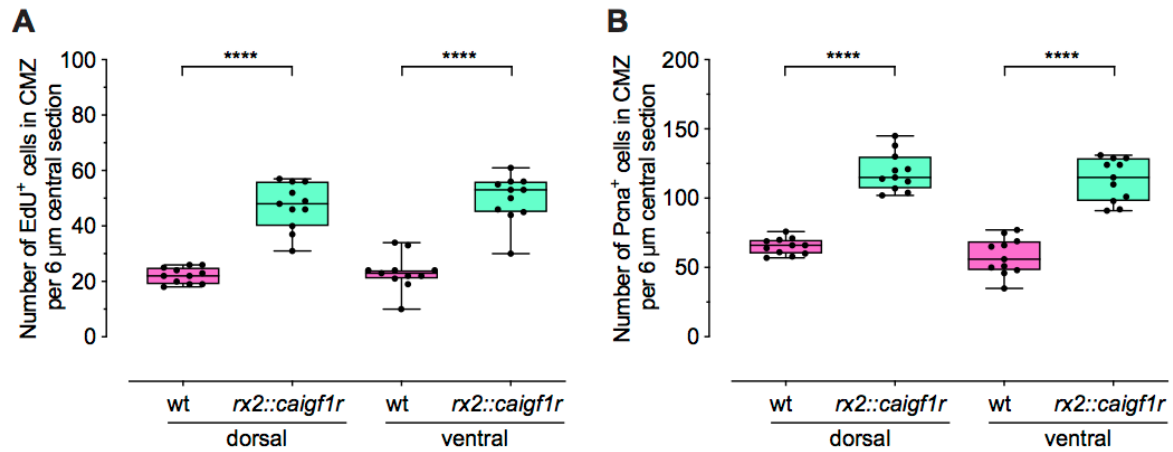

**Fig. S5: EdU- and PcnA-positive cell number is increased in *rx2::caigf1r* retinæ.**

(A,B) Quantification of EdU- (A) and PcnA-positive (B) cell number in the CMZ per 6 μm central section shows increased numbers in *rx2::caigf1r* (n = 11 sections from 4 retinæ in 4 fish) compared to wt (n = 11 sections from 4 retinæ in 4 fish) retinæ (data obtained from two independent experiments; t-test: \*\*\*\* $P_{d/v} < 0.0001$ ). Box plots depict median + quartiles with min-max whiskers.

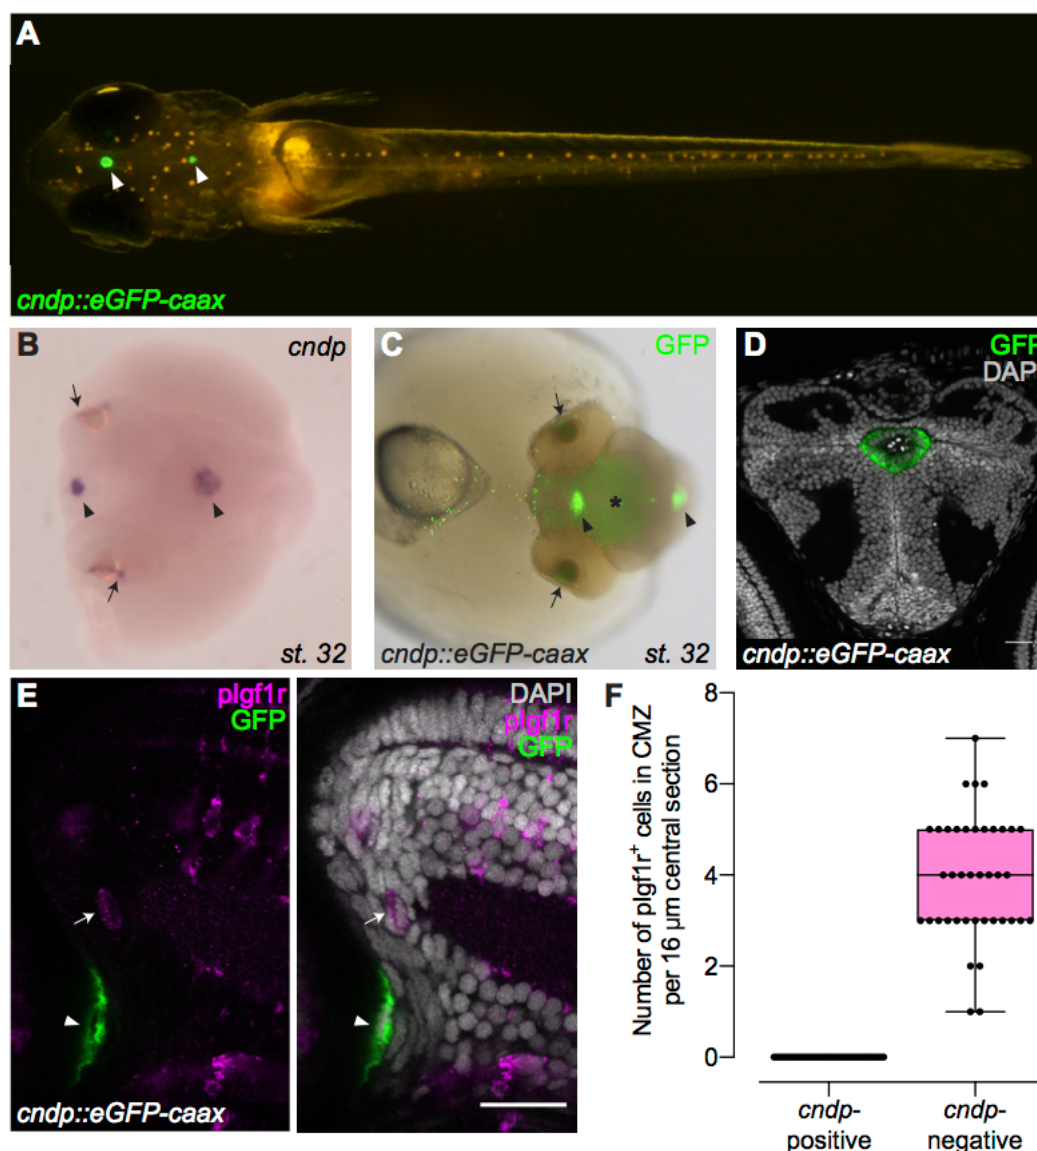

**Fig. S6: *Cndp* is expressed in the choroid plexi.** (A) *Cndp::eGFP-caax* hatchling shows GFP expression in the choroid plexi in the brain (arrowheads). Retinal GFP expression is masked by the retinal pigmented epithelium. (B) Whole-mount *in situ* hybridization for *cndp* in a stage 32 medaka embryo (dorsal view). Expression of *cndp* is visible in the peripheral retina (arrows) and the choroid plexi (arrowheads). Adapted from MEPD/(Alonso-Barba et al., 2016). (C) Whole-mount immunostaining against GFP (green) in a stage 32 *cndp::eGFP-caax* embryo. GFP expression (green) is visible in the peripheral retina (arrows) and the choroid plexi (arrowheads). Asterisk indicates unspecific background staining. (D) Cryosection of a *cndp::eGFP-caax* hatchling brain. The diencephalic choroid plexus is positive for GFP (green). (E) Cryosection of *cndp::eGFP-caax* hatchling with anti-plgf1r (magenta) staining shows lgf1r activity in single progenitors (arrow) but not in *cndp*-positive stem cells (green,



arrowhead). Scale bars are 20  $\mu\text{m}$ . (F) Quantification of plgf1r-positive/*cndp*-negative and plgf1r/*cndp*-double positive cell numbers in the CMZ per 16  $\mu\text{m}$  section show no GFP-positive cells co-labeled with plgf1r ( $n = 157$  cells in 40 sections from 5 fish). Box plots depict median + quartiles with min-max whiskers.

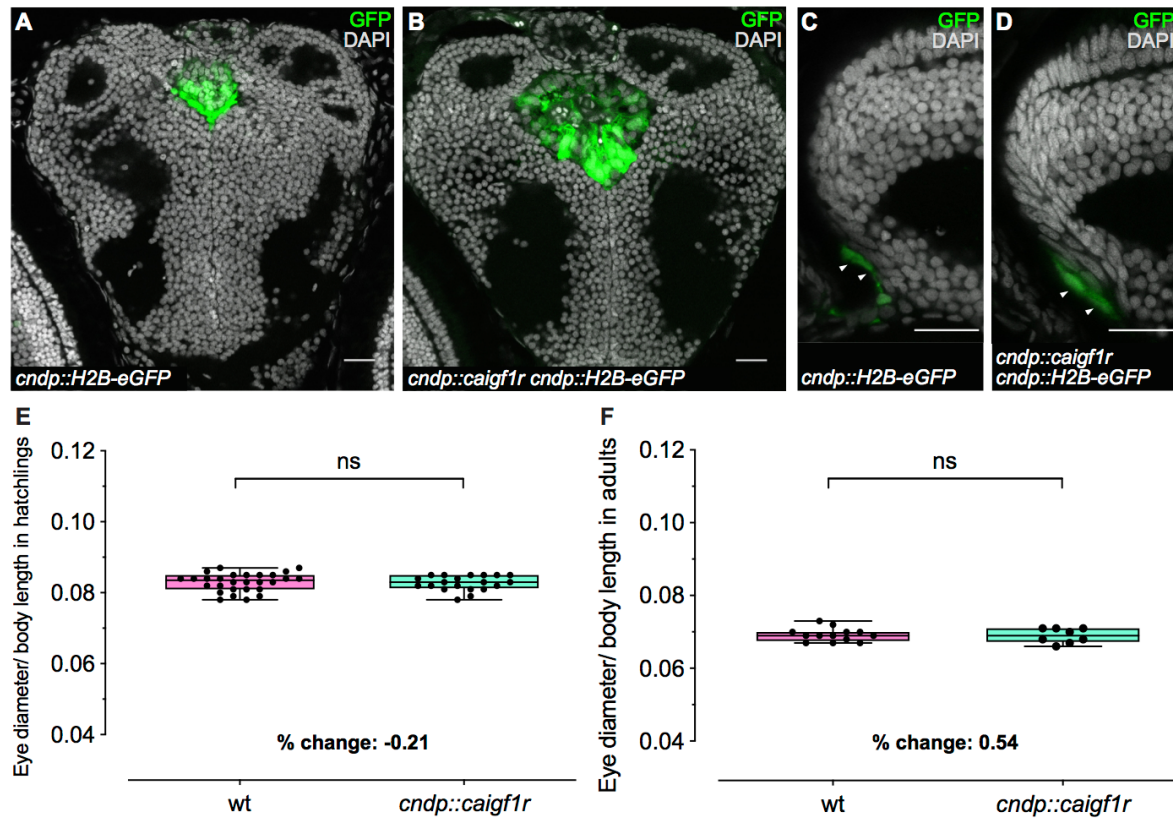

**Fig. S7: Expression of *caigf1r* in retinal stem cells does not result in increased eye size.** (A-D) Cryosections of wt (A,C) and *cndp::caigf1r* (B,D) *cndp::H2B-eGFP* reporter hatchlings. The GFP-positive (green) choroid plexi are enlarged in *cndp::caigf1r* (B) compared to wt (A) brains. *Cndp*-driven GFP expression (green, arrowheads) in the CMZ of *cndp::caigf1r* hatchlings (C) is not expanded compared to wt (D) (n = 3 fish each). Scale bars are 20  $\mu$ m. (E) Quantification of relative eye size (eye diameter normalized to body length) of wt (n = 28) and *cndp::caigf1r* (n = 20) hatchlings (Mann-Whitney test:  $^{ns}P = 0.7023$ ). (F) Quantification of relative eye size (eye diameter normalized to body length) of wt (n = 8) and *cndp::caigf1r* (n = 13) 3-month-old adult fish (t-test:  $^{ns}P = 0.7894$ ). The percentage change of relative eye size means of wt and *cndp::caigf1r* is > 1% in hatchlings (E) and adults (F). ns, not significant. Box plots depict median + quartiles with min-max whiskers.

**Table S1. Raw data and calculated values for relative eye size quantification at hatchling stage, with eye diameter measured in the anterior-posterior axis**

[Click here to download Table S1](#)

**Table S2: Raw data and calculated values for relative eye size quantification at hatchling stage, with eye diameter measured in the anterior-posterior axis.**

| Genotype                   | Fish | eye diameter<br>[a.u.] | body length<br>[a.u.] | ratio eye diameter/<br>body length |
|----------------------------|------|------------------------|-----------------------|------------------------------------|
| wildtype                   | 1    | 234'173                | 3'546'325             | 0.066                              |
| wildtype                   | 2    | 238'212                | 3'405'529             | 0.070                              |
| wildtype                   | 3    | 225'320                | 3'378'161             | 0.067                              |
| wildtype                   | 4    | 238'212                | 3'420'000             | 0.070                              |
| wildtype                   | 5    | 230'083                | 3'370'928             | 0.068                              |
| <i>rx2::caigf1r</i>        | 1    | 228'886                | 3'157'283             | 0.072                              |
| <i>rx2::caigf1r</i>        | 2    | 251'034                | 3'285'564             | 0.076                              |
| <i>rx2::caigf1r</i>        | 3    | 228'729                | 2'946'055             | 0.078                              |
| <i>rx2::caigf1r</i>        | 4    | 201'022                | 2'759'481             | 0.073                              |
| <i>rx2::caigf1r</i>        | 5    | 243'167                | 3'231'273             | 0.075                              |
| <i>rx2::caigf1r</i>        | 6    | 235'342                | 3'309'665             | 0.071                              |
| <i>rx2::caigf1r</i>        | 7    | 224'860                | 3'022'252             | 0.074                              |
| wildtype median            |      |                        |                       | 0.068                              |
| standard deviation         |      |                        |                       | 0.0017                             |
| <i>rx2::caigf1r</i> median |      |                        |                       | 0.074                              |
| standard deviation         |      |                        |                       | 0.0023                             |
